# Supplementary material for: Biogeographic implication of temperature-induced plant cell wall lignification
Source: PubMed Central journal article supplement (PMC9338036; doi:10.1038/s42003-022-03732-y), 2022-07-29
Supplement: 42003_2022_3732_MOESM2_ESM.pdf [file 42003_2022_3732_MOESM2_ESM.pdf]

## Description of Additional Supplementary Files

1  
2  
3  
4  
5  
6  
7  
8  
9  
10  
11  
12

**File name:** Supplementary Data 1

**Description:** Contains all relevant data.

**File name:** Supplementary Code 1

**Description:** Contains all relevant codes.
